# Supplementary material
Source: ML conference proceedings conference paper supplement (https://proceedings.neurips.cc/paper_files/paper/2023/hash/663bce02a0050c4a11f1eb8a7f1429d3-Abstract.html)
Supplement: Supplementary file 1 [file 663bce02a0050c4a11f1eb8a7f1429d3-Supplemental-Conference.zip]

Archive with 2 entries (2 files):
- Sharp_Spectral_Rates_for_Koopman_Operator_Learning.pdf
- __MACOSX/._Sharp_Spectral_Rates_for_Koopman_Operator_Learning.pdf
